# Supplementary material
Source: PubMed Central journal article supplement (PMC7323911)
Supplement: NIHMS1541550-supplement-1541550_Sup_Tab_1.pdf [file NIHMS1541550-supplement-1541550_Sup_Tab_1.pdf]

| Cell Line  | Base Media                                              | Extra                                                                                 | FBS | Culture Conditions |
|------------|---------------------------------------------------------|---------------------------------------------------------------------------------------|-----|--------------------|
| MUM51      | DMEM:F12 (w/ gln)<br>(Thermo: 11320033)                 | 1:100 Antibiotic-Antimycotic (Thermo: 15240062), 1:2000 gentamicin (Thermo: 15750078) | 10% | 37C, 10% CO2       |
| BT20       | EMEM (w/ Earle's salts and gln)<br>(Sigma: M4655-500ML) | 1:100 Anti-Anti, 1:2000 gen                                                           | 10% | 37C, 5% CO2        |
| BT549      | RPMI 1640 (w/ gln)<br>(Thermo: 11875093)                | 1:100 Anti-Anti, 1:2000 gen                                                           | 10% | 37C, 5% CO2        |
| CAL148     | DMEM (w/ gln, high glc, NaP) (Sigma: D5671-500ML)       | EGF (10 ng/mL) Thermo (PHG0311), 1:100 Anti-Anti, 1:2000 gen                          | 20% | 37C, 10% CO2       |
| CAL51      | DMEM (w/ gln, high glc, NaP)                            | 1:100 Anti-Anti, 1:2000 gen                                                           | 10% | 37C, 10% CO2       |
| DU4475     | RPMI 1640 (w/ gln)                                      | 1:100 Anti-Anti, 1:2000 gen                                                           | 10% | 37C, 5% CO2        |
| HCC1143    | RPMI (ATCC-Modified) (Thermo: A1049101)                 | 1:100 penstrep (Thermo: 15140122), 1:2000 gen                                         | 10% | 37C, 5% CO2        |
| HCC1187    | RPMI (ATCC-Modified)                                    | 1:100 penstrep, 1:2000 gen                                                            | 10% | 37C, 5% CO2        |
| HCC1599    | RPMI (ATCC-Modified)                                    | 1:100 penstrep, 1:2000 gen                                                            | 10% | 37C, 5% CO2        |
| HCC1806    | RPMI 1640 (w/ gln)                                      | 1:100 Anti-Anti, 1:2000 gen                                                           | 10% | 37C, 5% CO2        |
| HCC1937    | RPMI 1640 (w/ gln)                                      | 1:100 Anti-Anti, 1:2000 gen                                                           | 10% | 37C, 5% CO2        |
| HCC2157    | RPMI (ATCC-Modified)                                    | 1:100 penstrep, 1:2000 gen                                                            | 10% | 37C, 5% CO2        |
| HCC38      | RPMI (ATCC-Modified)                                    | 1:100 penstrep, 1:2000 gen                                                            | 10% | 37C, 5% CO2        |
| HCC70      | RPMI 1640 (w/ gln)                                      | 1:100 Anti-Anti, 1:2000 gen                                                           | 10% | 37C, 5% CO2        |
| HS578t     | DMEM (w/ gln, high glc, NaP)                            | 1:100 Anti-Anti, 1:2000 gen                                                           | 10% | 37C, 5% CO2        |
| MDA-MB-157 | DMEM (w/ gln, high glc, NaP)                            | 1:100 penstrep, 1:2000 gen                                                            | 10% | 37C, 5% CO2        |
| MDA-MB-231 | RPMI 1640 (w/ gln)                                      | 1:100 Anti-Anti, 1:2000 gen                                                           | 10% | 37C, 5% CO2        |
| MDA-MB-436 | DMEM:F12 (w/ gln)                                       | 1:100 Anti-Anti, 1:2000 gen                                                           | 10% | 37C, 5% CO2        |
| MDA-MB-453 | RPMI 1640 (w/ gln)                                      | Glutamine (6 mM final) (Thermo: 25030081), 10 mM HEPES (Thermo: 15630080), 1:100      | 10% | 37C, 5% CO2        |

|                   |                                       |                                                                                                                                                                                                                                                                           |               |              |
|-------------------|---------------------------------------|---------------------------------------------------------------------------------------------------------------------------------------------------------------------------------------------------------------------------------------------------------------------------|---------------|--------------|
|                   |                                       | Anti-Anti, 1:2000<br>gen                                                                                                                                                                                                                                                  |               |              |
| MDA-MB-468        | DMEM (w/ gln, high<br>glc, NaP)       | 1:100 Anti-Anti,<br>1:2000 gen                                                                                                                                                                                                                                            | 10%           | 37C, 5% CO2  |
| MFM223            | EMEM (w/ Earle's<br>salts and gln)    | 1:100 Penstrep,<br>1:2000 gen                                                                                                                                                                                                                                             | 10%           | 37C, 5% CO2  |
| SUM102            | F12 (w/ gln)<br>(Thermo:<br>11765054) | Insulin-Transferrin-<br>Selenium-<br>Ethanolamine<br>(Thermo:<br>51500056), HEPES<br>(10 mM), T3 (10<br>nM) (Sigma: Cat.<br>No. T6397), BSA<br>(0.1%) (Sigma:<br>A9418-100G), HC<br>(1 µg/mL) (Sigma:<br>H6909-10ML), EGF<br>(10 ng/mL) 1:100<br>Anti-Anti, 1:2000<br>gen | 2%            | 37C, 10% CO2 |
| SUM149            | F12 (w/ gln)                          | INS (5 µg/mL final)<br>(Sigma: C979A25),<br>HC (1 µg/mL final)<br>1:100 AmB, 1:200<br>penstrep, 1:2000<br>gen                                                                                                                                                             | 5% (Spec FBS) | 37C, 10% CO2 |
| SUM159            | F12 (w/ gln)                          | INS (5 µg/mL final),<br>HC (1 µg/mL final)<br>1:100 AmB, 1:200<br>penstrep, 1:2000<br>gen                                                                                                                                                                                 | 5% (Spec FBS) | 37C, 10% CO2 |
| SUM185            | F12 (w/ gln)                          | INS (5 µg/mL final),<br>HC (1 µg/mL final)<br>1:100 Amphotericin<br>B (Thermo:<br>15290026), 1:200<br>penstrep, 1:2000<br>gen                                                                                                                                             | 5% (Spec FBS) | 37C, 10% CO2 |
| SUM52             | F12 (w/ gln)                          | Insulin-Transferrin-<br>Selenium-<br>Ethanolamine,<br>HEPES (10 mM),<br>T3 (10 nM), BSA<br>(0.1%), HC (1<br>µg/mL), EGF (10<br>ng/mL) 1:100 Anti-<br>Anti, 1:2000 gen                                                                                                     | 2%            | 37C, 10% CO2 |
| VARI068 Cell Line | RPMI 1640 (w/ gln)                    | 1:100 Anti-Anti,<br>1:2000 gen                                                                                                                                                                                                                                            | 10%           | 37C, 10% CO2 |
