# Supplementary material
Source: PubMed Central journal article supplement (PMC7323911)
Supplement: NIHMS1541550-supplement-1541550_Sup_Tab_2.pdf [file NIHMS1541550-supplement-1541550_Sup_Tab_2.pdf]

| Cell Line: | Drug:      | IC50 (nM): | Slope: | MAX Response: | Min Drug Tested (nM): | Max Drug Tested (nM): | DSS <sub>3</sub> : |
|------------|------------|------------|--------|---------------|-----------------------|-----------------------|--------------------|
| MUM51      | Copanlisib | 910        | 0.6    | 100           | 3.2                   | 5000                  | 16.6               |
| BT20       | Copanlisib | 13         | 0.8    | 83            | 3.2                   | 5000                  | 61.7               |
| BT549      | Copanlisib | 170        | 0.7    | 96            | 3.2                   | 5000                  | 34.4               |
| Cal51      | Copanlisib | 31         | 0.8    | 98            | 3.2                   | 5000                  | 62.0               |
| Cal148     | Copanlisib | 15         | 1.5    | 99            | 3.2                   | 5000                  | 74.1               |
| DU4475     | Copanlisib | 900        | 0.6    | 100           | 3.2                   | 5000                  | 16.7               |
| HCC1806    | Copanlisib | 520        | 1.0    | 98            | 3.2                   | 5000                  | 16.2               |
| HCC1937    | Copanlisib | 190        | 2.1    | 71            | 3.2                   | 5000                  | 17.0               |
| HCC38      | Copanlisib | NA         | NA     | NA            | 3.2                   | 5000                  | 0.0                |
| HCC70      | Copanlisib | 98         | 1.3    | 73            | 3.2                   | 5000                  | 26.6               |
| HS578T     | Copanlisib | 120        | 0.7    | 85            | 3.2                   | 5000                  | 34.4               |
| MDA-MB-157 | Copanlisib | 9100       | 0.5    | 100           | 3.2                   | 5000                  | 0.0                |
| MDA-MB-231 | Copanlisib | 360        | 1.6    | 44            | 3.2                   | 5000                  | 6.4                |
| MDA-MB-436 | Copanlisib | 630        | 1.4    | 76            | 3.2                   | 5000                  | 8.9                |
| MDA-MB-453 | Copanlisib | 7          | 1.9    | 78            | 3.2                   | 5000                  | 68.8               |
| MDA-MB-468 | Copanlisib | 150        | 1.2    | 82            | 3.2                   | 5000                  | 25.2               |
| MFM223     | Copanlisib | 63         | 2.1    | 79            | 3.2                   | 5000                  | 33.0               |
| SUM102     | Copanlisib | 10         | 0.8    | 91            | 3.2                   | 5000                  | 70.1               |
| SUM149     | Copanlisib | 100        | 1.2    | 61            | 3.2                   | 5000                  | 21.5               |
| SUM159     | Copanlisib | 60         | 1.7    | 93            | 3.2                   | 5000                  | 41.2               |
| SUM185     | Copanlisib | 7          | 1.2    | 62            | 3.2                   | 5000                  | 53.4               |
| SUM52      | Copanlisib | 36         | 1.3    | 96            | 3.2                   | 5000                  | 54.6               |
| VARI068    | Copanlisib | 180        | 1.0    | 73            | 3.2                   | 5000                  | 20.8               |
| MUM51      | Dasatinib  | 15         | 0.3    | 100           | 3.2                   | 50000                 | 67.0               |
| BT20       | Dasatinib  | 2500       | 0.6    | 100           | 3.2                   | 50000                 | 20.0               |
| BT549      | Dasatinib  | 440        | 0.4    | 100           | 3.2                   | 50000                 | 44.0               |
| Cal51      | Dasatinib  | 430        | 0.2    | 100           | 3.2                   | 50000                 | 44.0               |
| Cal148     | Dasatinib  | 7200       | 0.8    | 100           | 3.2                   | 50000                 | 8.8                |
| DU4475     | Dasatinib  | 4700       | 2.2    | 100           | 3.2                   | 50000                 | 8.0                |
| HCC1806    | Dasatinib  | 240        | 0.4    | 100           | 3.2                   | 50000                 | 49.0               |
| HCC1937    | Dasatinib  | 1400       | 0.6    | 100           | 3.2                   | 50000                 | 25.0               |
| HCC38      | Dasatinib  | 3100       | 0.4    | 100           | 3.2                   | 50000                 | 22.0               |
| HCC70      | Dasatinib  | 6200       | 1.6    | 100           | 3.2                   | 50000                 | 7.0                |
| HS578T     | Dasatinib  | 22         | 0.8    | 90            | 3.2                   | 50000                 | 68.0               |
| MDA-MB-157 | Dasatinib  | 220        | 0.3    | 100           | 3.2                   | 50000                 | 48.0               |
| MDA-MB-231 | Dasatinib  | 890        | 0.3    | 100           | 3.2                   | 50000                 | 38.0               |
| MDA-MB-436 | Dasatinib  | 11000      | 1.8    | 100           | 3.2                   | 50000                 | 3.8                |
| MDA-MB-453 | Dasatinib  | 4600       | 1.7    | 95            | 3.2                   | 50000                 | 8.0                |
| MDA-MB-468 | Dasatinib  | 2800       | 0.4    | 100           | 3.2                   | 50000                 | 28.0               |
| MFM223     | Dasatinib  | 3100       | 0.8    | 100           | 3.2                   | 50000                 | 15.0               |
| SUM102     | Dasatinib  | 65         | 0.5    | 100           | 3.2                   | 50000                 | 61.0               |
| SUM149     | Dasatinib  | 890        | 0.4    | 100           | 3.2                   | 50000                 | 37.0               |
| SUM159     | Dasatinib  | 150        | 0.8    | 78            | 3.2                   | 50000                 | 37.0               |
| SUM185     | Dasatinib  | 7500       | 1.5    | 100           | 3.2                   | 50000                 | 6.1                |
| SUM52      | Dasatinib  | 110        | 0.5    | 100           | 3.2                   | 50000                 | 56.0               |
| VARI068    | Dasatinib  | 3200       | 0.3    | 100           | 3.2                   | 50000                 | 31.0               |

| Cell Line: | Drug:      | IC50 (nM): | Slope: | MAX Response: | Min Drug Tested (nM): | Max Drug Tested (nM): | DSS <sub>3</sub> : |
|------------|------------|------------|--------|---------------|-----------------------|-----------------------|--------------------|
| MUM51      | Trametinib | 3          | 1.2    | 60            | 0.3                   | 5000                  | 42.0               |
| BT20       | Trametinib | 18         | 1.2    | 32            | 0.3                   | 5000                  | 10.0               |
| BT549      | Trametinib | 1          | 2.1    | 6             | 0.3                   | 5000                  | 0.0                |
| Cal51      | Trametinib | 8          | 1.0    | 46            | 0.3                   | 5000                  | 23.0               |
| Cal148     | Trametinib | 2600       | 0.3    | 41            | 0.3                   | 5000                  | 2.0                |
| DU4475     | Trametinib | 14         | 0.9    | 70            | 0.3                   | 5000                  | 33.0               |
| HCC1806    | Trametinib | 57         | 0.5    | 100           | 0.3                   | 5000                  | 39.0               |
| HCC1937    | Trametinib | NA         | NA     | -9            | 0.3                   | 5000                  | 0.0                |
| HCC38      | Trametinib | NA         | NA     | 49            | 0.3                   | 5000                  | 0.0                |
| HCC70      | Trametinib | 1          | 1.8    | 18            | 0.3                   | 5000                  | 10.0               |
| HS578T     | Trametinib | 13         | 0.5    | 48            | 0.3                   | 5000                  | 22.0               |
| MDA-MB-157 | Trametinib | 1          | 1.4    | 16            | 0.3                   | 5000                  | 7.6                |
| MDA-MB-231 | Trametinib | 12         | 1.0    | 36            | 0.3                   | 5000                  | 14.0               |
| MDA-MB-436 | Trametinib | NA         | NA     | -9            | 0.3                   | 5000                  | 0.0                |
| MDA-MB-453 | Trametinib | 120        | 1.4    | 56            | 0.3                   | 5000                  | 10.0               |
| MDA-MB-468 | Trametinib | 2          | 0.7    | 10            | 0.3                   | 5000                  | 0.0                |
| MFM223     | Trametinib | 350        | 0.8    | 64            | 0.3                   | 5000                  | 7.4                |
| SUM102     | Trametinib | 2          | 1.8    | 52            | 0.3                   | 5000                  | 40.0               |
| SUM149     | Trametinib | 3          | 1.1    | 34            | 0.3                   | 5000                  | 20.0               |
| SUM159     | Trametinib | 3          | 0.9    | 70            | 0.3                   | 5000                  | 51.0               |
| SUM185     | Trametinib | NA         | NA     | NA            | 0.3                   | 5000                  | 0.0                |
| SUM52      | Trametinib | 1300       | 4.1    | 28            | 0.3                   | 5000                  | 0.5                |
| VARI068    | Trametinib | 1          | 0.9    | 13            | 0.3                   | 5000                  | 2.9                |
| MUM51      | TAK228     | 11         | 1.4    | 79            | 0.6                   | 10000                 | 46.0               |
| BT20       | TAK228     | 120        | 0.7    | 77            | 0.6                   | 10000                 | 24.0               |
| BT549      | TAK228     | 19         | 1.1    | 91            | 0.6                   | 10000                 | 48.0               |
| Cal51      | TAK228     | 15         | 1.0    | 88            | 0.6                   | 10000                 | 50.0               |
| Cal148     | TAK228     | 16         | 1.1    | 94            | 0.6                   | 10000                 | 51.0               |
| DU4475     | TAK228     | 39         | 0.9    | 85            | 0.6                   | 10000                 | 37.0               |
| HCC1806    | TAK228     | 27         | 1.3    | 85            | 0.6                   | 10000                 | 39.0               |
| HCC1937    | TAK228     | 50         | 0.8    | 79            | 0.6                   | 10000                 | 32.0               |
| HCC38      | TAK228     | 54         | 0.5    | 50            | 0.6                   | 10000                 | 19.0               |
| HCC70      | TAK228     | 13         | 1.1    | 68            | 0.6                   | 10000                 | 39.0               |
| HS578T     | TAK228     | 11         | 1.6    | 78            | 0.6                   | 10000                 | 44.0               |
| MDA-MB-157 | TAK228     | 67         | 0.9    | 78            | 0.6                   | 10000                 | 28.0               |
| MDA-MB-231 | TAK228     | 27         | 0.9    | 68            | 0.6                   | 10000                 | 32.0               |
| MDA-MB-436 | TAK228     | 36         | 2.3    | 79            | 0.6                   | 10000                 | 31.0               |
| MDA-MB-453 | TAK228     | 12         | 1.3    | 89            | 0.6                   | 10000                 | 53.0               |
| MDA-MB-468 | TAK228     | 58         | 1.0    | 77            | 0.6                   | 10000                 | 28.0               |
| MFM223     | TAK228     | 61         | 5.3    | 78            | 0.6                   | 10000                 | 23.0               |
| SUM102     | TAK228     | 4          | 1.3    | 86            | 0.6                   | 10000                 | 67.0               |
| SUM149     | TAK228     | 20         | 1.0    | 66            | 0.6                   | 10000                 | 33.0               |
| SUM159     | TAK228     | 17         | 1.6    | 93            | 0.6                   | 10000                 | 48.0               |
| SUM185     | TAK228     | 5          | 0.8    | 61            | 0.6                   | 10000                 | 46.0               |
| SUM52      | TAK228     | 9          | 1.1    | 92            | 0.6                   | 10000                 | 60.0               |
| VARI068    | TAK228     | 29         | 1.0    | 79            | 0.6                   | 10000                 | 36.0               |

| Cell Line: | Drug:        | IC50 (nM): | Slope: | MAX Response: | Min Drug Tested (nM): | Max Drug Tested (nM): | DSS <sub>3</sub> : |
|------------|--------------|------------|--------|---------------|-----------------------|-----------------------|--------------------|
| MUM51      | Temsirolimus | 1          | 0.7    | 46            | 0.6                   | 10000                 | 45.0               |
| BT20       | Temsirolimus | 1          | 6.7    | 15            | 0.6                   | 10000                 | 10.0               |
| BT549      | Temsirolimus | 1          | 0.5    | 55            | 0.6                   | 10000                 | 50.0               |
| Cal51      | Temsirolimus | 1          | 1.5    | 55            | 0.6                   | 10000                 | 54.0               |
| Cal148     | Temsirolimus | 1          | 1.7    | 47            | 0.6                   | 10000                 | 48.0               |
| DU4475     | Temsirolimus | 1          | 0.6    | 65            | 0.6                   | 10000                 | 62.0               |
| HCC1806    | Temsirolimus | 10         | 0.3    | 37            | 0.6                   | 10000                 | 18.0               |
| HCC1937    | Temsirolimus | 1          | 2.1    | 30            | 0.6                   | 10000                 | 29.0               |
| HCC38      | Temsirolimus | 1          | 2.4    | 23            | 0.6                   | 10000                 | 20.0               |
| HCC70      | Temsirolimus | 1          | 1.2    | 37            | 0.6                   | 10000                 | 36.0               |
| HS578T     | Temsirolimus | 1          | 1.1    | 44            | 0.6                   | 10000                 | 44.0               |
| MDA-MB-157 | Temsirolimus | 1          | 0.4    | 31            | 0.6                   | 10000                 | 21.0               |
| MDA-MB-231 | Temsirolimus | 1          | 1.5    | 21            | 0.6                   | 10000                 | 17.0               |
| MDA-MB-436 | Temsirolimus | 2          | 1.0    | 29            | 0.6                   | 10000                 | 21.0               |
| MDA-MB-453 | Temsirolimus | 1          | 0.8    | 69            | 0.6                   | 10000                 | 63.0               |
| MDA-MB-468 | Temsirolimus | 1          | 0.8    | 28            | 0.6                   | 10000                 | 22.0               |
| MFM223     | Temsirolimus | NA         | NA     | NA            | 0.6                   | 10000                 | 0.0                |
| SUM102     | Temsirolimus | 1          | 1.4    | 60            | 0.6                   | 10000                 | 59.0               |
| SUM149     | Temsirolimus | 1          | 1.1    | 26            | 0.6                   | 10000                 | 24.0               |
| SUM159     | Temsirolimus | 1          | 0.6    | 64            | 0.6                   | 10000                 | 58.0               |
| SUM185     | Temsirolimus | 1          | 0.6    | 49            | 0.6                   | 10000                 | 47.0               |
| SUM52      | Temsirolimus | 1          | 1.2    | 57            | 0.6                   | 10000                 | 58.0               |
| VARI068    | Temsirolimus | 1          | 1.2    | 64            | 0.6                   | 10000                 | 63.0               |
| MUM51      | Eribulin     | 1          | 1.1    | 57            | 0.6                   | 10000                 | 58.0               |
| BT20       | Eribulin     | 1          | 16.0   | 47            | 0.6                   | 10000                 | 49.0               |
| BT549      | Eribulin     | 1          | 1.7    | 79            | 0.6                   | 10000                 | 79.0               |
| Cal51      | Eribulin     | 2          | 0.8    | 86            | 0.6                   | 10000                 | 71.0               |
| Cal148     | Eribulin     | 1          | 15.0   | 69            | 0.6                   | 10000                 | 71.0               |
| DU4475     | Eribulin     | 10         | 1.0    | 90            | 0.6                   | 10000                 | 57.0               |
| HCC1806    | Eribulin     | 7          | 0.7    | 79            | 0.6                   | 10000                 | 55.0               |
| HCC1937    | Eribulin     | 1          | 1.4    | 67            | 0.6                   | 10000                 | 68.0               |
| HCC38      | Eribulin     | 12         | 0.3    | 41            | 0.6                   | 10000                 | 22.0               |
| HCC70      | Eribulin     | 1          | 1.1    | 58            | 0.6                   | 10000                 | 60.0               |
| HS578T     | Eribulin     | 1          | 1.2    | 70            | 0.6                   | 10000                 | 70.0               |
| MDA-MB-157 | Eribulin     | 1          | 2.1    | 41            | 0.6                   | 10000                 | 41.0               |
| MDA-MB-231 | Eribulin     | 2          | 1.2    | 55            | 0.6                   | 10000                 | 49.0               |
| MDA-MB-436 | Eribulin     | 1          | 1.2    | 71            | 0.6                   | 10000                 | 68.0               |
| MDA-MB-453 | Eribulin     | 1          | 0.6    | 58            | 0.6                   | 10000                 | 52.0               |
| MDA-MB-468 | Eribulin     | 1          | 15.0   | 65            | 0.6                   | 10000                 | 67.0               |
| MFM223     | Eribulin     | 1          | 0.9    | 68            | 0.6                   | 10000                 | 62.0               |
| SUM102     | Eribulin     | 1          | 1.9    | 53            | 0.6                   | 10000                 | 49.0               |
| SUM149     | Eribulin     | 2          | 0.5    | 54            | 0.6                   | 10000                 | 42.0               |
| SUM159     | Eribulin     | 1          | 1.1    | 94            | 0.6                   | 10000                 | 83.0               |
| SUM185     | Eribulin     | 24         | 0.3    | 80            | 0.6                   | 10000                 | 42.0               |
| SUM52      | Eribulin     | 1          | 1.5    | 76            | 0.6                   | 10000                 | 72.0               |
| VARI068    | Eribulin     | 24         | 0.5    | 48            | 0.6                   | 10000                 | 23.0               |

| Cell Line: | Drug:      | IC50 (nM): | Slope: | MAX Response: | Min Drug Tested (nM): | Max Drug Tested (nM): | DSS <sub>3</sub> : |
|------------|------------|------------|--------|---------------|-----------------------|-----------------------|--------------------|
| MUM51      | Paclitaxal | 110        | 3.9    | 47            | 0.6                   | 10000                 | 11.0               |
| BT20       | Paclitaxal | 150        | 2.3    | 69            | 0.6                   | 10000                 | 15.0               |
| BT549      | Paclitaxal | 110        | 2.0    | 96            | 0.6                   | 10000                 | 25.0               |
| Cal51      | Paclitaxal | 310        | 1.7    | 84            | 0.6                   | 10000                 | 14.0               |
| Cal148     | Paclitaxal | 4          | 8.7    | 85            | 0.6                   | 10000                 | 60.0               |
| DU4475     | Paclitaxal | 19         | 2.5    | 76            | 0.6                   | 10000                 | 36.0               |
| HCC1806    | Paclitaxal | 77         | 20.0   | 88            | 0.6                   | 10000                 | 23.0               |
| HCC1937    | Paclitaxal | 130        | 2.2    | 62            | 0.6                   | 10000                 | 15.0               |
| HCC38      | Paclitaxal | 1700       | 1.8    | 25            | 0.6                   | 10000                 | 0.6                |
| HCC70      | Paclitaxal | 3          | 2.7    | 65            | 0.6                   | 10000                 | 52.0               |
| HS578T     | Paclitaxal | 150        | 2.3    | 60            | 0.6                   | 10000                 | 13.0               |
| MDA-MB-157 | Paclitaxal | 190        | 3.5    | 44            | 0.6                   | 10000                 | 8.0                |
| MDA-MB-231 | Paclitaxal | 200        | 2.6    | 35            | 0.6                   | 10000                 | 6.0                |
| MDA-MB-436 | Paclitaxal | 110        | 1.8    | 70            | 0.6                   | 10000                 | 18.0               |
| MDA-MB-453 | Paclitaxal | 2          | 2.4    | 42            | 0.6                   | 10000                 | 36.0               |
| MDA-MB-468 | Paclitaxal | 89         | 0.6    | 63            | 0.6                   | 10000                 | 21.0               |
| MFM223     | Paclitaxal | 4          | 2.7    | 66            | 0.6                   | 10000                 | 47.0               |
| SUM102     | Paclitaxal | 9          | 0.6    | 50            | 0.6                   | 10000                 | 28.0               |
| SUM149     | Paclitaxal | 13         | 2.1    | 35            | 0.6                   | 10000                 | 17.0               |
| SUM159     | Paclitaxal | 2          | 2.4    | 92            | 0.6                   | 10000                 | 77.0               |
| SUM185     | Paclitaxal | 10         | 3.7    | 32            | 0.6                   | 10000                 | 25.0               |
| SUM52      | Paclitaxal | 3          | 1.4    | 78            | 0.6                   | 10000                 | 35.0               |
| VARI068    | Paclitaxal | 180        | 1.8    | 57            | 0.6                   | 10000                 | 12.0               |
| MUM51      | Docetaxel  | 2          | 2.6    | 80            | 0.1                   | 1000                  | 40.0               |
| BT20       | Docetaxel  | 2          | 1.7    | 73            | 0.1                   | 1000                  | 38.0               |
| BT549      | Docetaxel  | 1          | 2.5    | 90            | 0.1                   | 1000                  | 50.0               |
| Cal51      | Docetaxel  | 4          | 2.2    | 78            | 0.1                   | 1000                  | 31.0               |
| Cal148     | Docetaxel  | 2          | 3.7    | 88            | 0.1                   | 1000                  | 42.0               |
| DU4475     | Docetaxel  | 5          | 1.4    | 77            | 0.1                   | 1000                  | 28.0               |
| HCC1806    | Docetaxel  | 4          | 1.1    | 85            | 0.1                   | 1000                  | 37.0               |
| HCC1937    | Docetaxel  | 1          | 1.4    | 75            | 0.1                   | 1000                  | 47.0               |
| HCC38      | Docetaxel  | 1          | 1.5    | 74            | 0.1                   | 1000                  | 48.0               |
| HCC70      | Docetaxel  | 1          | 1.5    | 58            | 0.1                   | 1000                  | 35.0               |
| HS578T     | Docetaxel  | 1          | 1.7    | 96            | 0.1                   | 1000                  | 61.0               |
| MDA-MB-157 | Docetaxel  | 1          | 2.3    | 85            | 0.1                   | 1000                  | 48.0               |
| MDA-MB-231 | Docetaxel  | 2          | 1.4    | 56            | 0.1                   | 1000                  | 29.0               |
| MDA-MB-436 | Docetaxel  | 1          | 6.1    | 63            | 0.1                   | 1000                  | 45.0               |
| MDA-MB-453 | Docetaxel  | 1          | 1.7    | 44            | 0.1                   | 1000                  | 28.0               |
| MDA-MB-468 | Docetaxel  | 1          | 1.8    | 76            | 0.1                   | 1000                  | 50.0               |
| MFM223     | Docetaxel  | 740        | 12.0   | 97            | 0.1                   | 1000                  | 0.1                |
| SUM102     | Docetaxel  | 1          | 1.0    | 52            | 0.1                   | 1000                  | 36.0               |
| SUM149     | Docetaxel  | 5          | 1.0    | 44            | 0.1                   | 1000                  | 15.0               |
| SUM159     | Docetaxel  | 140        | 2.2    | 94            | 0.1                   | 1000                  | 5.3                |
| SUM185     | Docetaxel  | 2          | 10.0   | 20            | 0.1                   | 1000                  | 7.4                |
| SUM52      | Docetaxel  | 2          | 1.3    | 74            | 0.1                   | 1000                  | 39.0               |
| VARI068    | Docetaxel  | 3          | 1.5    | 76            | 0.1                   | 1000                  | 35.0               |

| Cell Line: | Drug:      | IC50 (nM): | Slope:    | MAX Response: | Min Drug Tested (nM): | Max Drug Tested (nM): | DSS <sub>3</sub> : |
|------------|------------|------------|-----------|---------------|-----------------------|-----------------------|--------------------|
| MUM51      | Mubritinib | 6          | 2.0       | 33            | 0.6                   | 10000                 | 20.0               |
| BT20       | Mubritinib | 45         | 1.5       | 39            | 0.6                   | 10000                 | 13.0               |
| BT549      | Mubritinib | 2          | 1.8       | 25            | 0.6                   | 10000                 | 19.0               |
| Cal51      | Mubritinib | NA         | NA        | NA            | 0.6                   | 10000                 | 0.0                |
| Cal148     | Mubritinib | 47         | 1.1       | 34            | 0.6                   | 10000                 | 11.0               |
| DU4475     | Mubritinib | NA         | NA        | NA            | 0.6                   | 10000                 | 0.0                |
| HCC1806    | Mubritinib | 20         | 1.3       | 57            | 0.6                   | 10000                 | 27.0               |
| HCC1937    | Mubritinib | 73         | 5.7       | 21            | 0.6                   | 10000                 | 4.5                |
| HCC38      | Mubritinib | NA         | NA        | NA            | 0.6                   | 10000                 | 0.0                |
| HCC70      | Mubritinib | 4          | 1.2       | 32            | 0.6                   | 10000                 | 21.0               |
| HS578T     | Mubritinib | 48         | 0.6       | 21            | 0.6                   | 10000                 | 3.5                |
| MDA-MB-157 | Mubritinib | NA         | NA        | NA            | 0.6                   | 10000                 | 0.0                |
| MDA-MB-231 | Mubritinib | 3          | 0.5       | 12            | 0.6                   | 10000                 | 0.7                |
| MDA-MB-436 | Mubritinib | 4          | 1.7       | 66            | 0.6                   | 10000                 | 49.0               |
| MDA-MB-453 | Mubritinib | 1          | 1.7       | 44            | 0.6                   | 10000                 | 41.0               |
| MDA-MB-468 | Mubritinib | 17         | 11.0      | 12            | 0.6                   | 10000                 | 1.7                |
| MFM223     | Mubritinib | NA         | NA        | NA            | 0.6                   | 10000                 | 0.0                |
| SUM102     | Mubritinib | NA         | NA        | NA            | 0.6                   | 10000                 | 0.0                |
| SUM149     | Mubritinib | 1          | 1.5       | 16            | 0.6                   | 10000                 | 8.7                |
| SUM159     | Mubritinib | 14         | 0.5       | 42            | 0.6                   | 10000                 | 22.0               |
| SUM185     | Mubritinib | 3          | 0.5       | 38            | 0.6                   | 10000                 | 26.0               |
| SUM52      | Mubritinib | 12         | 1.2       | 38            | 0.6                   | 10000                 | 20.0               |
| VARI068    | Mubritinib | 2900       | 5.3       | 74            | 0.6                   | 10000                 | 1.5                |
| MUM51      | AZD-1775   | 350        | 15.0      | 71            | 0.6                   | 10000                 | 9.0                |
| BT20       | AZD-1775   | 160        | 0.3       | 78            | 0.6                   | 10000                 | 31.0               |
| BT549      | AZD-1775   | 91         | 0.3       | 100           | 0.6                   | 10000                 | 44.0               |
| Cal51      | AZD-1775   | 120        | 0.5       | 95            | 0.6                   | 10000                 | 34.0               |
| Cal148     | AZD-1775   | 120        | 0.4       | 97            | 0.6                   | 10000                 | 40.0               |
| DU4475     | AZD-1775   | 320        | 0.8       | 86            | 0.6                   | 10000                 | 17.0               |
| HCC1806    | AZD-1775   | 110        | 1.0       | 91            | 0.6                   | 10000                 | 27.0               |
| HCC1937    | AZD-1775   | 180        | 0.2       | 81            | 0.6                   | 10000                 | 32.0               |
| HCC38      | AZD-1775   | 3000       | 0.2       | 59            | 0.6                   | 10000                 | 10.0               |
| HCC70      | AZD-1775   | 110        | 0.4       | 74            | 0.6                   | 10000                 | 28.0               |
| HS578T     | AZD-1775   | 96         | 9.8       | 63            | 0.6                   | 10000                 | 15.0               |
| MDA-MB-157 | AZD-1775   | 95         | 0.7       | 58            | 0.6                   | 10000                 | 18.0               |
| MDA-MB-231 | AZD-1775   | 360        | 30000.0   | 39            | 0.6                   | 10000                 | 4.8                |
| MDA-MB-436 | AZD-1775   | 270        | 0.4       | 73            | 0.6                   | 10000                 | 20.0               |
| MDA-MB-453 | AZD-1775   | 310        | 0.1       | 73            | 0.6                   | 10000                 | 28.0               |
| MDA-MB-468 | AZD-1775   | 230        | 0.1       | 83            | 0.6                   | 10000                 | 34.0               |
| MFM223     | AZD-1775   | 400        | 4300000.0 | 68            | 0.6                   | 10000                 | 7.9                |
| SUM102     | AZD-1775   | 230        | 0.3       | 77            | 0.6                   | 10000                 | 28.0               |
| SUM149     | AZD-1775   | 1300       | 0.2       | 69            | 0.6                   | 10000                 | 19.0               |
| SUM159     | AZD-1775   | 220        | 0.2       | 94            | 0.6                   | 10000                 | 36.0               |
| SUM185     | AZD-1775   | 330        | 0.2       | 70            | 0.6                   | 10000                 | 25.0               |
| SUM52      | AZD-1775   | 210        | 0.2       | 90            | 0.6                   | 10000                 | 35.0               |
| VARI068    | AZD-1775   | 100        | 0.1       | 73            | 0.6                   | 10000                 | 31.0               |

| Cell Line: | Drug:      | IC50 (nM): | Slope: | MAX Response: | Min Drug Tested (nM): | Max Drug Tested (nM): | DSS <sub>3</sub> : |
|------------|------------|------------|--------|---------------|-----------------------|-----------------------|--------------------|
| MUM51      | Romidepsin | 2          | 7.6    | 91            | 0.6                   | 10000                 | 50.0               |
| BT20       | Romidepsin | 13         | 2.3    | 98            | 0.6                   | 10000                 | 35.0               |
| BT549      | Romidepsin | 14         | 2.2    | 100           | 0.6                   | 10000                 | 45.0               |
| Cal51      | Romidepsin | 14         | 18.0   | 98            | 0.6                   | 10000                 | 46.0               |
| Cal148     | Romidepsin | 3          | 3.3    | 100           | 0.6                   | 10000                 | 74.0               |
| DU4475     | Romidepsin | 2          | 2.6    | 100           | 0.6                   | 10000                 | 67.0               |
| HCC1806    | Romidepsin | 200        | 20.0   | 100           | 0.6                   | 10000                 | 17.0               |
| HCC1937    | Romidepsin | 4          | 7.7    | 90            | 0.6                   | 10000                 | 55.0               |
| HCC38      | Romidepsin | 3          | 7.5    | 76            | 0.6                   | 10000                 | 20.0               |
| HCC70      | Romidepsin | 3          | 2.4    | 100           | 0.6                   | 10000                 | 54.0               |
| HS578T     | Romidepsin | 2          | 0.7    | 100           | 0.6                   | 10000                 | 58.0               |
| MDA-MB-157 | Romidepsin | 5          | 2.2    | 100           | 0.6                   | 10000                 | 44.0               |
| MDA-MB-231 | Romidepsin | 7          | 5.0    | 80            | 0.6                   | 10000                 | 46.0               |
| MDA-MB-436 | Romidepsin | 5          | 5.5    | 88            | 0.6                   | 10000                 | 52.0               |
| MDA-MB-453 | Romidepsin | 4          | 1.3    | 100           | 0.6                   | 10000                 | 31.0               |
| MDA-MB-468 | Romidepsin | 14         | 1.9    | 100           | 0.6                   | 10000                 | 40.0               |
| MFM223     | Romidepsin | 3          | 1.0    | 100           | 0.6                   | 10000                 | 63.0               |
| SUM102     | Romidepsin | 2          | 4.5    | 91            | 0.6                   | 10000                 | 64.0               |
| SUM149     | Romidepsin | 1          | 1.4    | 100           | 0.6                   | 10000                 | 14.0               |
| SUM159     | Romidepsin | 3          | 12.0   | 96            | 0.6                   | 10000                 | 69.0               |
| SUM185     | Romidepsin | 2          | 0.6    | 100           | 0.6                   | 10000                 | 21.0               |
| SUM52      | Romidepsin | 8          | 2.5    | 85            | 0.6                   | 10000                 | 55.0               |
| VARI068    | Romidepsin | 14         | 1.1    | 100           | 0.6                   | 10000                 | 37.0               |
| MUM51      | Bortezomib | 2          | 3.2    | 74            | 0.6                   | 10000                 | 60.0               |
| BT20       | Bortezomib | 14         | 9.6    | 85            | 0.6                   | 10000                 | 41.0               |
| BT549      | Bortezomib | 9          | 2.7    | 96            | 0.6                   | 10000                 | 56.0               |
| Cal51      | Bortezomib | 7          | 3.6    | 96            | 0.6                   | 10000                 | 58.0               |
| Cal148     | Bortezomib | 14         | 9.7    | 97            | 0.6                   | 10000                 | 46.0               |
| DU4475     | Bortezomib | 3          | 4.3    | 87            | 0.6                   | 10000                 | 66.0               |
| HCC1806    | Bortezomib | 10         | 3.3    | 96            | 0.6                   | 10000                 | 53.0               |
| HCC1937    | Bortezomib | 11         | 2.9    | 87            | 0.6                   | 10000                 | 47.0               |
| HCC38      | Bortezomib | 6          | 2.1    | 60            | 0.6                   | 10000                 | 40.0               |
| HCC70      | Bortezomib | 3          | 3.3    | 84            | 0.6                   | 10000                 | 66.0               |
| HS578T     | Bortezomib | 3          | 2.2    | 84            | 0.6                   | 10000                 | 65.0               |
| MDA-MB-157 | Bortezomib | 8          | 1.8    | 73            | 0.6                   | 10000                 | 45.0               |
| MDA-MB-231 | Bortezomib | 5          | 4.2    | 87            | 0.6                   | 10000                 | 57.0               |
| MDA-MB-436 | Bortezomib | 13         | 11.0   | 84            | 0.6                   | 10000                 | 42.0               |
| MDA-MB-453 | Bortezomib | 6          | 1.9    | 66            | 0.6                   | 10000                 | 44.0               |
| MDA-MB-468 | Bortezomib | 5          | 2.1    | 91            | 0.6                   | 10000                 | 62.0               |
| MFM223     | Bortezomib | 4          | 2.3    | 86            | 0.6                   | 10000                 | 62.0               |
| SUM102     | Bortezomib | 3          | 1.8    | 86            | 0.6                   | 10000                 | 69.0               |
| SUM149     | Bortezomib | 17         | 1.7    | 69            | 0.6                   | 10000                 | 35.0               |
| SUM159     | Bortezomib | 3          | 2.2    | 97            | 0.6                   | 10000                 | 76.0               |
| SUM185     | Bortezomib | 9          | 1.1    | 64            | 0.6                   | 10000                 | 40.0               |
| SUM52      | Bortezomib | 3          | 2.1    | 90            | 0.6                   | 10000                 | 69.0               |
| VARI068    | Bortezomib | 47         | 1.2    | 87            | 0.6                   | 10000                 | 33.0               |
