# Supplementary material
Source: PubMed Central journal article supplement (PMC7323911)
Supplement: NIHMS1541550-supplement-1541550_Sup_Tab_3.pdf [file NIHMS1541550-supplement-1541550_Sup_Tab_3.pdf]

| Drug       | Gene                             | Sequence Ontology | Mutation: RefSeq v108            | dbNSFP Functional Prediction Voting |                    |
|------------|----------------------------------|-------------------|----------------------------------|-------------------------------------|--------------------|
|            |                                  |                   |                                  | Predicted Tolerated                 | Predicted Damaging |
| Copanlisib | PIK3CA*                          | Missense          | NM_006218.3:c.3140A>T            | 4 of 5                              | 1 of 5             |
|            |                                  | Missense          | NM_006218.3:c.3140A>G            | 3 of 5                              | 2 of 5             |
|            |                                  | Missense          | NM_006218.3:c.1633G>A            | 2 of 5                              | 3 of 5             |
|            |                                  | Missense          | NM_006218.3:c.1624G>A            | 2 of 5                              | 3 of 5             |
|            |                                  | Missense          | NM_006218.3:c.1616C>G            | 0 of 5                              | 5 of 5             |
|            |                                  | Missense          | NM_006218.3:c.1173A>G            | 4 of 5                              | 1 of 5             |
|            |                                  | Missense          | NM_006218.3:c.1048G>A            | 2 of 5                              | 3 of 5             |
|            |                                  | Missense          | NM_006218.3:c.333G>C             | 1 of 5                              | 4 of 5             |
| Trametinib | PCDH15                           | Missense          | NM_001142771.1:c.4982A>C         | 3 of 5                              | 0 of 5             |
| Trametinib | PGR                              | Missense          | NM_000926.4:c.1031G>C            | NA                                  | NA                 |
| Trametinib | TRIM58*                          | Missense          | NM_015431.3:c.1366C>G            | 2 of 5                              | 3 of 5             |
|            |                                  | Missense          | NM_015431.3:c.1121C>T            | 3 of 5                              | 2 of 5             |
|            |                                  | Missense          | NM_015431.3:c.964G>A             | 4 of 5                              | 1 of 5             |
|            |                                  | Missense          | NM_015431.3:c.8G>C               | 5 of 5                              | 0 of 5             |
| Trametinib | BCHE*                            | Missense          | NM_000055.3:c.293A>G             | 1 of 5                              | 4 of 5             |
|            |                                  | Missense          | NM_000055.3:c.635C>T             | 3 of 5                              | 2 of 5             |
|            |                                  | Missense          | NM_000055.3:c.849G>C             | 4 of 5                              | 1 of 5             |
|            |                                  | Missense          | NM_000055.3:c.1699G>A            | 5 of 5                              | 0 of 5             |
| Trametinib | SLC6A5                           | Missense          | NM_004211.4:c.1371G>C            | 3 of 5                              | 2 of 5             |
| Trametinib | PGR*                             | Missense          | NM_000926.4:c.557C>T             | 2 of 5                              | 3 of 5             |
|            |                                  | Missense          | NM_000926.4:c.1031G>C            | 3 of 5                              | 2 of 5             |
|            |                                  | Missense          | NM_000926.4:c.1040G>C            | 4 of 5                              | 1 of 5             |
|            |                                  | Missense          | NM_000926.4:c.1075C>A            | 1 of 5                              | 4 of 5             |
|            |                                  | Missense          | NM_000926.4:c.1300C>T            | 3 of 5                              | 2 of 5             |
|            |                                  | Missense          | NM_000926.4:c.1978G>T            | 3 of 5                              | 2 of 5             |
| Trametinib | ZFHX3*                           | Missense          | NM_006885.3:c.185C>T             | 4 of 5                              | 1 of 5             |
|            |                                  | Missense          | NM_006885.3:c.214T>G             | 4 of 5                              | 1 of 5             |
|            |                                  | Missense          | NM_006885.3:c.337G>A             | 4 of 5                              | 1 of 5             |
|            |                                  | Missense          | NM_006885.3:c.1378G>C            | 2 of 5                              | 3 of 5             |
|            |                                  | Missense          | NM_006885.3:c.1492G>A            | 3 of 5                              | 2 of 5             |
|            |                                  | Loss of Function  | NM_006885.3:c.2096delG           | NA                                  | NA                 |
|            |                                  | Missense          | NM_006885.3:c.2345C>T            | 3 of 5                              | 2 of 5             |
|            |                                  | Missense          | NM_006885.3:c.2989G>T            | 2 of 5                              | 3 of 5             |
|            |                                  | Missense          | NM_006885.3:c.5026A>G            | 5 of 5                              | 0 of 5             |
|            |                                  | Missense          | NM_006885.3:c.5218_5223delCAACAA | NA                                  | NA                 |
|            |                                  | Missense          | NM_006885.3:c.5221_5223dupCAA    | NA                                  | NA                 |
|            |                                  | Missense          | NM_006885.3:c.6335C>A            | 3 of 5                              | 2 of 5             |
|            |                                  | Missense          | NM_006885.3:c.7193C>A            | 3 of 5                              | 2 of 5             |
|            |                                  | Missense          | NM_006885.3:c.7750C>A            | 4 of 5                              | 1 of 5             |
|            |                                  | Missense          | NM_006885.3:c.8707A>G            | 4 of 5                              | 1 of 5             |
|            |                                  | Missense          | NM_006885.3:c.9130T>G            | 2 of 5                              | 3 of 5             |
| Missense   | NM_006885.3:c.9606_9611delGCAGCA | NA                | NA                               |                                     |                    |
| Missense   | NM_006885.3:c.9609_9611dupGCA    | NA                | NA                               |                                     |                    |
| TAK228     | WRN*                             | Missense          | NM_000553.4:c.4099T>C            | 2 of 5                              | 3 of 5             |
|            |                                  | Missense          | NM_000553.4:c.3222G>T            | 5 of 5                              | 0 of 5             |
|            |                                  | Missense          | NM_000553.4:c.2950T>A            | 2 of 5                              | 3 of 5             |
|            |                                  | Missense          | NM_000553.4:c.2291A>G            | 5 of 5                              | 0 of 5             |
|            |                                  | Missense          | NM_000553.4:c.1530_1532delAGA    | NA                                  | NA                 |
|            |                                  | Missense          | NM_000553.4:c.1161G>A            | 5 of 5                              | 0 of 5             |
|            |                                  | Missense          | NM_000553.4:c.340G>A             | 5 of 5                              | 0 of 5             |
| Docetaxel  | SMAD7                            | Missense          | NM_005904.3:c.668-21C>T          | NA                                  | NA                 |
